# Supplementary material
Source: publisher figshare collection journal article supplement (https://sage.figshare.com/ndownloader/files/17922428)
Supplement: Supplementary file 1 [file 17922428]

## **List of interviews and oral sources**

1. Italy: Industrial relations expert. Former member of the Scientific Department of Confindustria, former Director of the FIAT Historical Archive, by phone from Milan. 25.9.2018
2. Italy: Responsible for the Trade Union Department, Confindustria, Milan Province Territorial Association (Assolombarda), by phone from Milan. 5.10.2018
3. Italy: Head of the Welfare State and Human Capital Department Confindustria, Milan Province Territorial Association (Assolombarda), Milan. 26.09.2018
4. Italy: Head of the Trade Union Department Confindustria, Turin Province Territorial Association (Unione Industriale di Torino), by phone from Turin, 8.10.2018.
5. Spain: Industrial relations expert, by phone from Barcelona. 6.11.2018
6. Spain: Industrial relations expert, by phone from Madrid. 13.11.2018
7. Spain: Industrial relations expert, by phone from Madrid. 20.11.2018
8. Spain: Industrial relations expert, by phone from Madrid. 20.11.2018
9. Spain: Trade unionist, industrial relations expert, director of the Studies Department of the Spanish trade union CCOO. By phone from Madrid. 23.11.2018
10. Portugal: President, Confederation of Portuguese Services, 24.10.2017
11. Portugal: President, Confederation of Portuguese Farmers CAP, Lisbon, 20.10.2017
12. Portugal: President, Confederation of Portuguese Entrepreneurs CIP, 18.10.2017
13. Portugal: Legal advisor, Confederation of Portuguese Farmers CAP, Lisbon, 3.11.2017
14. Portugal: Former State Secretary for Employment 2011-2013, London, 23.05.2015.
